# Supplementary material
Source: PubMed Central journal article supplement (PMC1838993)
Supplement: mbc_E06-04-0360_1.pdf [file mbc_E06-04-0360_1.pdf]

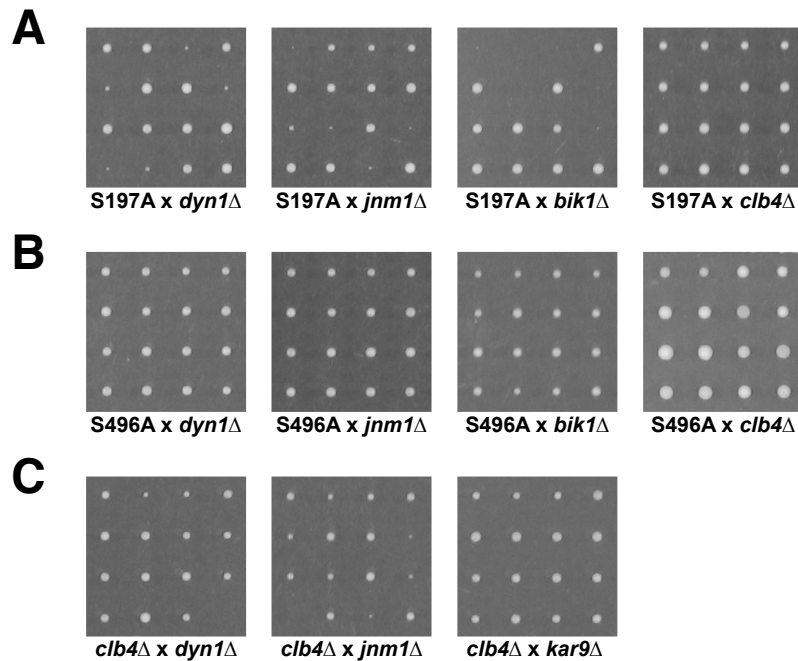

**Figure S1. *kar9*-S197A is lethal in combination with mutants of the dynein pathway**

(A) Progeny containing *kar9*-S197A in combination with mutants of the dynein pathway (either *dyn1*Δ, *jnm1*Δ, or *bik1*Δ) displayed either severely impaired growth or did not produce colonies. Double mutants were generated by meiotic crosses. The resulting haploid progeny were scored for growth after 2-3 days at 30 degrees. The four spores of sample tetrads are arranged in vertical columns. *Kar9p*-S197A-tap (yRM6168), *dyn1*Δ (yRM1094), *jnm1*Δ (yRM469), *bik1*Δ (yRM565), and *clb4*Δ (yRM6152) were used as parental strains.

(B) Double mutants containing *kar9*-S496A in combination with dynein pathway mutants did not exhibit obvious growth defects. *Kar9p*-S496A-tap (yRM6015), *dyn1*Δ (yRM1094), *jnm1*Δ (yRM469), *bik1*Δ (yRM565), and *clb4*Δ (yRM6152) were used as parental strains.

(C) The *clb4*Δ mutation displayed a weak genetic interaction with dynein pathway mutants. *clb4*Δ (yRM6026), *dyn1*Δ (yRM1094), *jnm1*Δ (yRM469), and *kar9*Δ (yRM369) were used as parental strains.
