# Supplementary material
Source: PubMed Central journal article supplement (PMC1838993)

**A**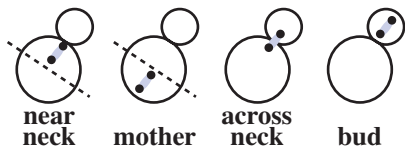

|                     | near neck | mother | across neck | bud  | N   |
|---------------------|-----------|--------|-------------|------|-----|
| <i>KAR9</i>         | 92        | 3      | 4.5         | 0.5  | 200 |
| <i>kar9Δ</i>        | 70.9      | 18.9   | 7.8         | 2.4  | 206 |
| <i>kar9-S197A</i>   | 73        | 26     | 1           | 0    | 200 |
| <i>kar9-S496A</i>   | 87        | 10     | 2.5         | 0.5  | 200 |
| <i>KAR9 clb4Δ</i>   | 77.5      | 12     | 6.5         | 4    | 200 |
| <i>KAR9 stu2-13</i> | 64.2      | 15.5   | 6.9         | 13.3 | 232 |

**B**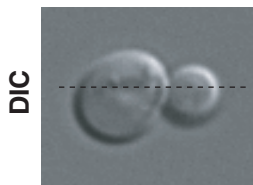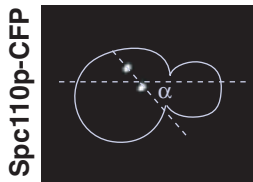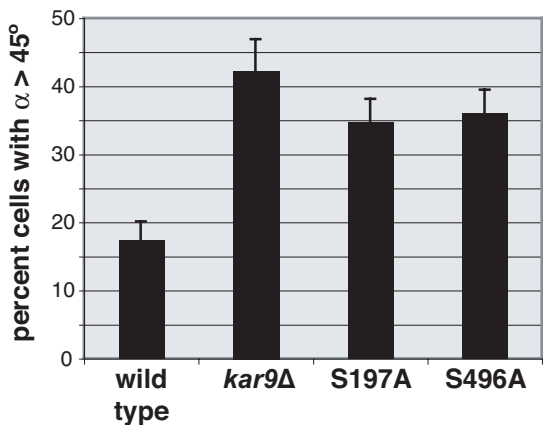

Supplement: mbc_E06-04-0360_2.pdf [file mbc_E06-04-0360_2.pdf]
